# Supplementary material
Source: MDPI journal article supplement (https://www.mdpi.com/1424-2818/13/3/102)
Supplement: s1 [file s1]

Table S1. Supplementary data for all butterflies sampled near Monterrey Mexico in 2019. The VSMOW-1 results refer to wing  $\delta^2\text{H}$  values calibrated to the former in-house keratin calibration standards EC-01 (−197 ‰) and EC-02 (−54.1 ‰); the VSMOW-2 results refer to the same samples calibrated to the values reported by Soto et al. (2017) EC-01 (−157 ‰) and EC-02 (−35.3 ‰). Date is the day of field sampling.

Soto, D.; Koehler, G.; Wassenaar, L.; Hobson, K. Determination of Stable Hydrogen Isotopic Compositions of Complex Organic Materials: Contrasting the Role of Exchangeable Hydrogen and Residual Moisture. *Rapid Comm Mass Spec* **2017**, *31*, 1193–1203.

| ISO LAB | Date       | Species                     | VSMOW-1 | VSMOW-2 |
|---------|------------|-----------------------------|---------|---------|
| 11443   | 2019-10-08 | <i>Libytheana carinenta</i> | -66.9   | -46.8   |
| 11444   | 2019-10-08 | <i>Libytheana carinenta</i> | -56.0   | -37.5   |
| 11445   | 2019-10-08 | <i>Libytheana carinenta</i> | -72.5   | -51.6   |
| 11446   | 2019-10-10 | <i>Libytheana carinenta</i> | -79.2   | -57.3   |
| 11447   | 2019-10-10 | <i>Libytheana carinenta</i> | -72.6   | -51.6   |
| 11448   | 2019-10-10 | <i>Libytheana carinenta</i> | -81.9   | -59.5   |
| 11449   | 2019-10-10 | <i>Libytheana carinenta</i> | -74.5   | -53.2   |
| 11450   | 2019-10-10 | <i>Libytheana carinenta</i> | -92.7   | -68.7   |
| 11451   | 2019-10-10 | <i>Libytheana carinenta</i> | -66.6   | -46.5   |
| 11452   | 2019-10-10 | <i>Libytheana carinenta</i> | -94.4   | -70.1   |
| 11453   | 2019-10-10 | <i>Libytheana carinenta</i> | -94.7   | -70.4   |
| 11454   | 2019-10-10 | <i>Libytheana carinenta</i> | -86.7   | -63.5   |
| 11455   | 2019-10-10 | <i>Libytheana carinenta</i> | -76.6   | -55.0   |
| 11456   | 2019-09-26 | <i>Libytheana carinenta</i> | -101.6  | -76.2   |
| 11457   | 2019-09-26 | <i>Libytheana carinenta</i> | -83.1   | -60.5   |
| 11458   | 2019-09-26 | <i>Libytheana carinenta</i> | -88.4   | -65.0   |
| 11459   | 2019-09-26 | <i>Libytheana carinenta</i> | -93.7   | -69.6   |
| 11460   | 2019-09-26 | <i>Libytheana carinenta</i> | -98.0   | -73.2   |
| 11461   | 2019-09-26 | <i>Libytheana carinenta</i> | -85.5   | -62.6   |
| 11462   | 2019-09-26 | <i>Libytheana carinenta</i> | -104.1  | -78.4   |
| 11463   | 2019-09-26 | <i>Libytheana carinenta</i> | -105.3  | -79.4   |
| 11464   | 2019-09-26 | <i>Libytheana carinenta</i> | -90.9   | -67.2   |
| 11465   | 2019-09-26 | <i>Libytheana carinenta</i> | -104.7  | -78.9   |
| 11466   | 2019-09-30 | <i>Libytheana carinenta</i> | -97.5   | -72.8   |
| 11467   | 2019-09-30 | <i>Libytheana carinenta</i> | -95.7   | -71.3   |
| 11468   | 2019-09-30 | <i>Libytheana carinenta</i> | -90.6   | -66.9   |
| 11469   | 2019-09-30 | <i>Libytheana carinenta</i> | -80.2   | -58.1   |
| 11470   | 2019-09-30 | <i>Libytheana carinenta</i> | -99.8   | -74.8   |
| 11471   | 2019-09-30 | <i>Libytheana carinenta</i> | -92.0   | -68.2   |
| 11472   | 2019-09-30 | <i>Libytheana carinenta</i> | -106.5  | -80.5   |
| 11473   | 2019-09-30 | <i>Libytheana carinenta</i> | -88.2   | -64.9   |
| 11474   | 2019-09-30 | <i>Libytheana carinenta</i> | -94.6   | -70.4   |

|       |            |                             |        |       |
|-------|------------|-----------------------------|--------|-------|
| 11475 | 2019-09-30 | <i>Libytheana carinenta</i> | -88.2  | -64.9 |
| 11476 | 2019-10-04 | <i>Libytheana carinenta</i> | -89.7  | -66.2 |
| 11477 | 2019-10-04 | <i>Libytheana carinenta</i> | -77.0  | -55.4 |
| 11478 | 2019-10-04 | <i>Libytheana carinenta</i> | -87.3  | -64.1 |
| 11479 | 2019-10-04 | <i>Libytheana carinenta</i> | -96.0  | -71.6 |
| 11480 | 2019-10-04 | <i>Libytheana carinenta</i> | -89.2  | -65.8 |
| 11481 | 2019-10-04 | <i>Libytheana carinenta</i> | -89.3  | -65.8 |
| 11482 | 2019-10-04 | <i>Libytheana carinenta</i> | -95.5  | -71.1 |
| 11483 | 2019-10-04 | <i>Libytheana carinenta</i> | -99.5  | -74.5 |
| 11484 | 2019-10-04 | <i>Libytheana carinenta</i> | -88.7  | -65.4 |
| 11485 | 2019-10-04 | <i>Libytheana carinenta</i> | -92.2  | -68.3 |
| 11486 | 2019-10-08 | <i>Libytheana carinenta</i> | -72.1  | -51.2 |
| 11487 | 2019-10-08 | <i>Libytheana carinenta</i> | -79.1  | -57.2 |
| 11488 | 2019-10-08 | <i>Libytheana carinenta</i> | -96.7  | -72.1 |
| 11489 | 2019-10-08 | <i>Libytheana carinenta</i> | -86.1  | -63.1 |
| 11490 | 2019-10-08 | <i>Libytheana carinenta</i> | -72.5  | -51.6 |
| 11491 | 2019-10-08 | <i>Libytheana carinenta</i> | -71.2  | -50.5 |
| 11492 | 2019-10-08 | <i>Libytheana carinenta</i> | -86.9  | -63.8 |
| 11493 | 2019-10-08 | <i>Libytheana carinenta</i> | -87.6  | -64.4 |
| 11494 | 2019-10-08 | <i>Libytheana carinenta</i> | -75.6  | -54.3 |
| 11495 | 2019-10-08 | <i>Libytheana carinenta</i> | -83.7  | -61.2 |
| 11496 | 2019-10-10 | <i>Libytheana carinenta</i> | -71.9  | -51.0 |
| 11497 | 2019-10-10 | <i>Libytheana carinenta</i> | -92.7  | -68.8 |
| 11498 | 2019-10-10 | <i>Libytheana carinenta</i> | -78.5  | -56.7 |
| 11499 | 2019-10-10 | <i>Libytheana carinenta</i> | -83.9  | -61.3 |
| 11500 | 2019-10-10 | <i>Libytheana carinenta</i> | -70.2  | -49.6 |
| 11501 | 2019-10-10 | <i>Libytheana carinenta</i> | -89.5  | -66.1 |
| 11502 | 2019-10-10 | <i>Libytheana carinenta</i> | -81.0  | -58.7 |
| 11503 | 2019-10-10 | <i>Libytheana carinenta</i> | -88.9  | -65.4 |
| 11504 | 2019-10-10 | <i>Libytheana carinenta</i> | -96.4  | -71.9 |
| 11505 | 2019-10-10 | <i>Libytheana carinenta</i> | -90.6  | -66.9 |
| 11506 | 2019-10-14 | <i>Libytheana carinenta</i> | -87.0  | -63.8 |
| 11507 | 2019-10-14 | <i>Libytheana carinenta</i> | -88.7  | -65.2 |
| 11508 | 2019-10-14 | <i>Libytheana carinenta</i> | -84.9  | -62.0 |
| 11509 | 2019-10-14 | <i>Libytheana carinenta</i> | -92.8  | -68.7 |
| 11510 | 2019-10-14 | <i>Libytheana carinenta</i> | -95.5  | -71.1 |
| 11511 | 2019-10-14 | <i>Libytheana carinenta</i> | -90.7  | -67.0 |
| 11512 | 2019-10-14 | <i>Libytheana carinenta</i> | -95.1  | -70.7 |
| 11513 | 2019-10-14 | <i>Libytheana carinenta</i> | -102.1 | -76.6 |
| 11514 | 2019-10-14 | <i>Libytheana carinenta</i> | -89.8  | -66.2 |
| 11515 | 2019-10-14 | <i>Libytheana carinenta</i> | -98.3  | -73.5 |
| 12491 | 2019-10-08 | <i>Libytheana carinenta</i> | -106.6 | -81.3 |
| 12492 | 2019-10-08 | <i>Libytheana carinenta</i> | -88.3  | -65.7 |
| 12493 | 2019-10-08 | <i>Libytheana carinenta</i> | -87.7  | -65.2 |

---

|       |            |                             |        |       |
|-------|------------|-----------------------------|--------|-------|
| 12494 | 2019-10-08 | <i>Libytheana carinenta</i> | -83.9  | -62.0 |
| 12495 | 2019-10-08 | <i>Libytheana carinenta</i> | -92.6  | -69.3 |
| 12496 | 2019-10-08 | <i>Libytheana carinenta</i> | -80.5  | -59.1 |
| 12497 | 2019-10-08 | <i>Libytheana carinenta</i> | -98.0  | -74.0 |
| 12498 | 2019-10-08 | <i>Libytheana carinenta</i> | -96.4  | -72.5 |
| 12499 | 2019-10-08 | <i>Libytheana carinenta</i> | -97.0  | -73.1 |
| 12500 | 2019-10-08 | <i>Libytheana carinenta</i> | -83.0  | -61.2 |
| 12516 | 2019-10-10 | <i>Libytheana carinenta</i> | -60.5  | -42.2 |
| 12517 | 2019-10-10 | <i>Libytheana carinenta</i> | -96.9  | -73.0 |
| 12518 | 2019-10-10 | <i>Libytheana carinenta</i> | -92.0  | -68.9 |
| 12519 | 2019-10-10 | <i>Libytheana carinenta</i> | -86.4  | -64.1 |
| 12520 | 2019-10-10 | <i>Libytheana carinenta</i> | -92.9  | -69.6 |
| 12521 | 2019-10-10 | <i>Libytheana carinenta</i> | -100.8 | -76.3 |
| 12522 | 2019-10-10 | <i>Libytheana carinenta</i> | -82.5  | -60.8 |
| 12523 | 2019-10-10 | <i>Libytheana carinenta</i> | -87.5  | -65.0 |
| 12524 | 2019-10-10 | <i>Libytheana carinenta</i> | -78.1  | -57.0 |
| 12525 | 2019-10-10 | <i>Libytheana carinenta</i> | -99.7  | -75.4 |
| 12541 | 2019-10-19 | <i>Libytheana carinenta</i> | -101.8 | -77.2 |
| 12542 | 2019-10-19 | <i>Libytheana carinenta</i> | -93.1  | -69.8 |
| 12543 | 2019-10-19 | <i>Libytheana carinenta</i> | -98.2  | -74.1 |
| 12544 | 2019-10-19 | <i>Libytheana carinenta</i> | -99.1  | -74.8 |
| 12545 | 2019-10-19 | <i>Libytheana carinenta</i> | -92.4  | -69.2 |
| 12546 | 2019-10-19 | <i>Libytheana carinenta</i> | -101.6 | -77.0 |
| 12547 | 2019-10-19 | <i>Libytheana carinenta</i> | -74.9  | -54.4 |
| 12548 | 2019-10-19 | <i>Libytheana carinenta</i> | -109.7 | -83.8 |
| 12549 | 2019-10-19 | <i>Libytheana carinenta</i> | -77.0  | -56.1 |
| 12550 | 2019-10-19 | <i>Libytheana carinenta</i> | -69.4  | -49.7 |
| 12561 | 2019-10-14 | <i>Libytheana carinenta</i> | -125.3 | -97.1 |
| 12562 | 2019-10-14 | <i>Libytheana carinenta</i> | -108.8 | -83.1 |
| 12563 | 2019-10-14 | <i>Libytheana carinenta</i> | -102.1 | -77.5 |
| 12564 | 2019-10-14 | <i>Libytheana carinenta</i> | -100.8 | -76.3 |
| 12565 | 2019-10-14 | <i>Libytheana carinenta</i> | -98.6  | -74.4 |
| 12566 | 2019-10-14 | <i>Libytheana carinenta</i> | -94.6  | -71.1 |
| 12567 | 2019-10-14 | <i>Libytheana carinenta</i> | -89.3  | -66.6 |
| 12568 | 2019-10-14 | <i>Libytheana carinenta</i> | -82.9  | -61.1 |
| 12569 | 2019-10-14 | <i>Libytheana carinenta</i> | -101.3 | -67.7 |
| 12570 | 2019-10-14 | <i>Libytheana carinenta</i> | -92.2  | -59.8 |
| 12581 | 2019-10-23 | <i>Libytheana carinenta</i> | -109.6 | -75.0 |
| 12582 | 2019-10-23 | <i>Libytheana carinenta</i> | -72.4  | -42.5 |
| 12583 | 2019-10-23 | <i>Libytheana carinenta</i> | -98.0  | -64.9 |
| 12584 | 2019-10-23 | <i>Libytheana carinenta</i> | -85.0  | -53.5 |
| 12585 | 2019-10-23 | <i>Libytheana carinenta</i> | -99.4  | -66.2 |
| 12586 | 2019-10-23 | <i>Libytheana carinenta</i> | -81.7  | -50.6 |
| 12587 | 2019-10-23 | <i>Libytheana carinenta</i> | -84.9  | -53.5 |

|       |            |                             |        |        |
|-------|------------|-----------------------------|--------|--------|
| 12588 | 2019-10-23 | <i>Libytheana carinenta</i> | -78.5  | -47.8  |
| 12589 | 2019-10-23 | <i>Libytheana carinenta</i> | -85.9  | -54.3  |
| 12590 | 2019-10-23 | <i>Libytheana carinenta</i> | -91.6  | -59.3  |
| 12601 | 2019-10-26 | <i>Libytheana carinenta</i> | -101.7 | -68.1  |
| 12602 | 2019-10-26 | <i>Libytheana carinenta</i> | -85.9  | -54.3  |
| 12603 | 2019-10-26 | <i>Libytheana carinenta</i> | -117.5 | -82.0  |
| 12604 | 2019-10-26 | <i>Libytheana carinenta</i> | -100.4 | -67.0  |
| 12605 | 2019-10-26 | <i>Libytheana carinenta</i> | -103.8 | -70.0  |
| 12606 | 2019-10-26 | <i>Libytheana carinenta</i> | -90.6  | -58.4  |
| 12607 | 2019-10-26 | <i>Libytheana carinenta</i> | -110.8 | -76.1  |
| 12608 | 2019-10-26 | <i>Libytheana carinenta</i> | -153.8 | -113.7 |
| 12609 | 2019-10-26 | <i>Libytheana carinenta</i> | -109.1 | -74.6  |
| 12610 | 2019-10-26 | <i>Libytheana carinenta</i> | -83.5  | -52.2  |
| 12611 | 2019-10-29 | <i>Libytheana carinenta</i> | -103.8 | -70.0  |
| 12612 | 2019-10-29 | <i>Libytheana carinenta</i> | -98.1  | -65.0  |
| 12613 | 2019-10-29 | <i>Libytheana carinenta</i> | -79.6  | -48.8  |
| 12614 | 2019-10-29 | <i>Libytheana carinenta</i> | -88.7  | -56.8  |
| 12615 | 2019-10-29 | <i>Libytheana carinenta</i> | -89.9  | -57.8  |
| 12616 | 2019-10-29 | <i>Libytheana carinenta</i> | -95.5  | -62.7  |
| 12617 | 2019-10-29 | <i>Libytheana carinenta</i> | -100.5 | -67.1  |
| 12618 | 2019-10-29 | <i>Libytheana carinenta</i> | -86.5  | -54.9  |
| 12619 | 2019-10-29 | <i>Libytheana carinenta</i> | -88.1  | -56.2  |
| 12620 | 2019-10-29 | <i>Libytheana carinenta</i> | -192.7 | -147.8 |
| 12631 | 2019-11-04 | <i>Libytheana carinenta</i> | -196.6 | -151.2 |
| 12632 | 2019-11-04 | <i>Libytheana carinenta</i> | -98.4  | -65.2  |
| 12633 | 2019-11-04 | <i>Libytheana carinenta</i> | -112.1 | -77.3  |
| 12634 | 2019-11-04 | <i>Libytheana carinenta</i> | -94.0  | -61.4  |
| 12635 | 2019-11-04 | <i>Libytheana carinenta</i> | -94.0  | -61.4  |
| 12636 | 2019-11-04 | <i>Libytheana carinenta</i> | -78.6  | -47.9  |
| 12637 | 2019-11-04 | <i>Libytheana carinenta</i> | -167.2 | -131.0 |
| 12638 | 2019-11-04 | <i>Libytheana carinenta</i> | -140.6 | -108.3 |
| 12639 | 2019-11-04 | <i>Libytheana carinenta</i> | -92.6  | -67.4  |
| 12640 | 2019-11-04 | <i>Libytheana carinenta</i> | -123.7 | -93.9  |
| 12641 | 2019-11-04 | <i>Libytheana carinenta</i> | -94.0  | -68.5  |
| 12642 | 2019-11-04 | <i>Libytheana carinenta</i> | -195.2 | -154.9 |
| 12643 | 2019-11-04 | <i>Libytheana carinenta</i> | -94.9  | -69.3  |
| 12644 | 2019-11-04 | <i>Libytheana carinenta</i> | -106.5 | -79.2  |
| 12645 | 2019-11-04 | <i>Libytheana carinenta</i> | -112.2 | -84.1  |
| 12646 | 2019-11-04 | <i>Libytheana carinenta</i> | -87.5  | -63.0  |
| 12647 | 2019-11-04 | <i>Libytheana carinenta</i> | -116.1 | -87.4  |
| 12648 | 2019-11-04 | <i>Libytheana carinenta</i> | -202.9 | -161.5 |
| 12649 | 2019-11-04 | <i>Libytheana carinenta</i> | -89.4  | -64.7  |
| 12650 | 2019-11-04 | <i>Libytheana carinenta</i> | -101.5 | -74.9  |
| 12933 | 2019-10-14 | <i>Danaus gilippus</i>      | -95.1  | -69.4  |

---

|       |            |                        |        |       |
|-------|------------|------------------------|--------|-------|
| 12934 | 2019-10-14 | <i>Danaus gilippus</i> | -90.7  | -65.7 |
| 12935 | 2019-10-14 | <i>Danaus gilippus</i> | -88.4  | -63.8 |
| 12936 | 2019-10-14 | <i>Danaus gilippus</i> | -94.4  | -68.9 |
| 12937 | 2019-10-14 | <i>Danaus gilippus</i> | -70.6  | -48.5 |
| 12938 | 2019-10-14 | <i>Danaus gilippus</i> | -96.9  | -71.1 |
| 12939 | 2019-10-14 | <i>Danaus gilippus</i> | -82.2  | -58.5 |
| 12940 | 2019-10-14 | <i>Danaus gilippus</i> | -91.8  | -66.7 |
| 12941 | 2019-10-14 | <i>Danaus gilippus</i> | -91.5  | -66.4 |
| 12942 | 2019-10-14 | <i>Danaus gilippus</i> | -92.4  | -67.2 |
| 12943 | 2019-10-14 | <i>Danaus gilippus</i> | -107.1 | -79.7 |
| 12944 | 2019-10-14 | <i>Danaus gilippus</i> | -94.2  | -68.8 |
| 12945 | 2019-10-14 | <i>Danaus gilippus</i> | -94.8  | -69.3 |
| 12946 | 2019-10-14 | <i>Danaus gilippus</i> | -87.3  | -62.8 |
| 12947 | 2019-10-14 | <i>Danaus gilippus</i> | -84.9  | -60.8 |
| 12948 | 2019-10-14 | <i>Danaus gilippus</i> | -96.0  | -70.3 |
| 12949 | 2019-10-14 | <i>Danaus gilippus</i> | -85.5  | -61.3 |
| 12950 | 2019-10-14 | <i>Danaus gilippus</i> | -83.9  | -59.9 |
| 12951 | 2019-10-14 | <i>Danaus gilippus</i> | -72.1  | -49.9 |
| 12952 | 2019-10-14 | <i>Danaus gilippus</i> | -83.9  | -59.9 |
| 12953 | 2014-10-19 | <i>Danaus gilippus</i> | -87.1  | -62.6 |
| 12954 | 2014-10-19 | <i>Danaus gilippus</i> | -103.3 | -76.5 |
| 12955 | 2014-10-19 | <i>Danaus gilippus</i> | -84.1  | -60.1 |
| 12956 | 2014-10-19 | <i>Danaus gilippus</i> | -74.4  | -51.8 |
| 12957 | 2014-10-19 | <i>Danaus gilippus</i> | -94.1  | -69.2 |
| 12958 | 2014-10-19 | <i>Danaus gilippus</i> | -71.2  | -49.7 |
| 12959 | 2014-10-19 | <i>Danaus gilippus</i> | -88.6  | -64.6 |
| 12960 | 2014-10-19 | <i>Danaus gilippus</i> | -86.6  | -62.9 |
| 12961 | 2014-10-19 | <i>Danaus gilippus</i> | -91.3  | -66.9 |
| 12962 | 2014-10-19 | <i>Danaus gilippus</i> | -93.4  | -68.7 |
| 12963 | 2014-10-19 | <i>Danaus gilippus</i> | -81.1  | -58.2 |
| 12964 | 2014-10-19 | <i>Danaus gilippus</i> | -91.7  | -67.2 |
| 12965 | 2014-10-19 | <i>Danaus gilippus</i> | -79.8  | -57.1 |
| 12966 | 2014-10-19 | <i>Danaus gilippus</i> | -105.6 | -79.0 |
| 12967 | 2014-10-19 | <i>Danaus gilippus</i> | -79.5  | -56.9 |
| 12968 | 2014-10-19 | <i>Danaus gilippus</i> | -84.6  | -61.2 |
| 12969 | 2014-10-19 | <i>Danaus gilippus</i> | -89.7  | -65.5 |
| 12970 | 2014-10-19 | <i>Danaus gilippus</i> | -80.9  | -58.0 |
| 12971 | 2014-10-19 | <i>Danaus gilippus</i> | -88.9  | -64.8 |
| 12972 | 2014-10-19 | <i>Danaus gilippus</i> | -82.4  | -59.3 |
| 12973 | 2019-10-29 | <i>Danaus gilippus</i> | -83.3  | -60.1 |
| 12974 | 2019-10-29 | <i>Danaus gilippus</i> | -61.6  | -41.6 |
| 12975 | 2019-10-29 | <i>Danaus gilippus</i> | -73.4  | -51.7 |

---

|       |            |                        |        |       |
|-------|------------|------------------------|--------|-------|
| 12976 | 2019-10-29 | <i>Danaus gilippus</i> | -76.0  | -53.8 |
| 12977 | 2019-10-29 | <i>Danaus gilippus</i> | -81.4  | -58.4 |
| 12978 | 2019-10-29 | <i>Danaus gilippus</i> | -81.5  | -58.6 |
| 12979 | 2019-10-29 | <i>Danaus gilippus</i> | -67.6  | -46.7 |
| 12980 | 2019-10-29 | <i>Danaus gilippus</i> | -81.2  | -58.3 |
| 12981 | 2019-10-29 | <i>Danaus gilippus</i> | -102.7 | -76.6 |
| 12982 | 2019-10-29 | <i>Danaus gilippus</i> | -68.9  | -47.8 |
| 12983 | 2019-10-29 | <i>Danaus gilippus</i> | -76.1  | -54.0 |
| 12984 | 2019-10-29 | <i>Danaus gilippus</i> | -83.7  | -60.4 |
| 12985 | 2019-10-29 | <i>Danaus gilippus</i> | -88.5  | -64.5 |
| 12986 | 2019-10-29 | <i>Danaus gilippus</i> | -86.3  | -62.6 |
| 12987 | 2019-10-29 | <i>Danaus gilippus</i> | -71.9  | -50.4 |
| 12988 | 2019-10-29 | <i>Danaus gilippus</i> | -87.0  | -63.2 |
| 12989 | 2019-10-29 | <i>Danaus gilippus</i> | -83.6  | -60.3 |
| 12990 | 2019-10-29 | <i>Danaus gilippus</i> | -67.7  | -46.7 |
| 12991 | 2019-10-29 | <i>Danaus gilippus</i> | -87.8  | -63.9 |
| 12992 | 2019-10-29 | <i>Danaus gilippus</i> | -83.2  | -60.0 |
| 12993 | 2019-11-02 | <i>Danaus gilippus</i> | -77.2  | -54.9 |
| 12994 | 2019-11-02 | <i>Danaus gilippus</i> | -108.7 | -81.7 |
| 12995 | 2019-11-02 | <i>Danaus gilippus</i> | -85.3  | -61.8 |
| 12996 | 2019-11-02 | <i>Danaus gilippus</i> | -78.0  | -55.6 |
| 12997 | 2019-11-02 | <i>Danaus gilippus</i> | -83.0  | -59.8 |
| 12998 | 2019-11-02 | <i>Danaus gilippus</i> | -84.5  | -61.1 |
| 12999 | 2019-11-02 | <i>Danaus gilippus</i> | -88.8  | -64.8 |
| 13000 | 2019-11-02 | <i>Danaus gilippus</i> | -85.4  | -61.9 |
| 13001 | 2019-11-02 | <i>Danaus gilippus</i> | -70.0  | -48.8 |
| 13002 | 2019-11-04 | <i>Danaus gilippus</i> | -78.9  | -56.4 |
| 13003 | 2019-11-04 | <i>Danaus gilippus</i> | -78.6  | -56.1 |
| 13004 | 2019-11-04 | <i>Danaus gilippus</i> | -86.5  | -62.8 |
| 13005 | 2019-11-04 | <i>Danaus gilippus</i> | -63.0  | -42.8 |
| 13006 | 2019-11-04 | <i>Danaus gilippus</i> | -73.3  | -51.6 |
| 13007 | 2019-11-04 | <i>Danaus gilippus</i> | -72.5  | -50.9 |
| 13008 | 2019-11-04 | <i>Danaus gilippus</i> | -84.8  | -61.3 |
| 13009 | 2019-11-04 | <i>Danaus gilippus</i> | -105.3 | -78.9 |
| 13010 | 2019-11-04 | <i>Danaus gilippus</i> | -92.8  | -68.2 |
| 13011 | 2019-11-04 | <i>Danaus gilippus</i> | -85.6  | -62.0 |
| 13012 | 2019-11-04 | <i>Danaus gilippus</i> | -70.8  | -49.4 |
| 13013 | 2019-11-04 | <i>Danaus gilippus</i> | -61.1  | -41.2 |
| 13014 | 2019-11-04 | <i>Danaus gilippus</i> | -86.7  | -63.0 |
| 13015 | 2019-11-04 | <i>Danaus gilippus</i> | -90.1  | -65.9 |
| 13016 | 2019-11-04 | <i>Danaus gilippus</i> | -78.1  | -55.7 |
| 13017 | 2019-11-04 | <i>Danaus gilippus</i> | -68.4  | -47.4 |

|       |            |                          |        |       |
|-------|------------|--------------------------|--------|-------|
| 13018 | 2019-11-04 | <i>Danaus gilippus</i>   | -63.7  | -43.4 |
| 13019 | 2019-11-04 | <i>Danaus gilippus</i>   | -69.1  | -48.0 |
| 13020 | 2019-11-04 | <i>Danaus gilippus</i>   | -68.0  | -47.1 |
| 13021 | 2019-11-04 | <i>Danaus gilippus</i>   | -65.1  | -44.6 |
| 13022 | 2019-11-04 | <i>Danaus gilippus</i>   | -68.4  | -47.4 |
| 13023 | 2019-11-20 | <i>Danaus gilippus</i>   | -82.1  | -59.1 |
| 13024 | 2019-11-20 | <i>Danaus gilippus</i>   | -69.9  | -48.7 |
| 13025 | 2019-11-20 | <i>Danaus gilippus</i>   | -70.1  | -48.8 |
| 13026 | 2019-11-20 | <i>Danaus gilippus</i>   | -73.3  | -51.6 |
| 13027 | 2019-11-20 | <i>Danaus gilippus</i>   | -89.3  | -65.2 |
| 13028 | 2019-11-20 | <i>Danaus gilippus</i>   | -86.1  | -62.5 |
| 13029 | 2019-11-20 | <i>Danaus gilippus</i>   | -96.0  | -70.9 |
| 13030 | 2019-11-20 | <i>Danaus gilippus</i>   | -82.8  | -59.6 |
| 13031 | 2019-11-20 | <i>Danaus gilippus</i>   | -60.2  | -40.4 |
| 13032 | 2019-11-20 | <i>Danaus gilippus</i>   | -91.2  | -66.8 |
| 13033 | 2019-10-26 | <i>Euptoieta claudia</i> | -108.9 | -82.5 |
| 13034 | 2019-10-26 | <i>Euptoieta claudia</i> | -85.5  | -62.6 |
| 13035 | 2019-10-26 | <i>Euptoieta claudia</i> | -92.8  | -68.8 |
| 13036 | 2019-10-29 | <i>Euptoieta claudia</i> | -84.1  | -61.5 |
| 13037 | 2019-10-29 | <i>Euptoieta claudia</i> | -70.4  | -49.8 |
| 13038 | 2019-10-29 | <i>Euptoieta claudia</i> | -83.0  | -60.5 |
| 13039 | 2019-10-29 | <i>Euptoieta claudia</i> | -72.3  | -51.4 |
| 13040 | 2019-10-29 | <i>Euptoieta claudia</i> | -68.2  | -47.9 |
| 13041 | 2019-10-29 | <i>Euptoieta claudia</i> | -104.1 | -78.5 |
| 13042 | 2019-10-29 | <i>Euptoieta claudia</i> | -69.6  | -49.1 |
| 13043 | 2019-11-02 | <i>Euptoieta claudia</i> | -80.5  | -58.4 |
| 13044 | 2019-11-02 | <i>Euptoieta claudia</i> | -64.3  | -44.6 |
| 13045 | 2019-11-02 | <i>Euptoieta claudia</i> | -99.5  | -74.5 |
| 13046 | 2019-11-04 | <i>Euptoieta claudia</i> | -91.8  | -68.0 |
| 13047 | 2019-10-08 | <i>Euptoieta claudia</i> | -72.2  | -51.3 |
| 13048 | 2019-11-20 | <i>Euptoieta claudia</i> | -84.4  | -61.7 |
| 13049 | 2019-10-14 | <i>Euptoieta claudia</i> | -102.1 | -76.7 |
| 13050 | 2019-10-14 | <i>Euptoieta claudia</i> | -68.6  | -48.2 |
| 13051 | 2019-10-14 | <i>Euptoieta claudia</i> | -104.4 | -78.7 |
| 13052 | 2019-10-19 | <i>Euptoieta claudia</i> | -70.1  | -49.6 |
| 13053 | 2019-10-19 | <i>Euptoieta claudia</i> | -96.0  | -71.6 |
| 13054 | 2019-10-19 | <i>Euptoieta claudia</i> | -91.8  | -68.0 |
| 13055 | 2019-10-19 | <i>Euptoieta claudia</i> | -94.6  | -70.4 |
| 13056 | 2019-10-19 | <i>Euptoieta claudia</i> | -93.8  | -69.7 |
| 13057 | 2019-10-19 | <i>Euptoieta claudia</i> | -90.1  | -66.6 |
| 13058 | 2019-10-19 | <i>Euptoieta hegesia</i> | -90.3  | -66.7 |
| 13059 | 2019-10-19 | <i>Euptoieta hegesia</i> | -71.0  | -50.3 |

|       |            |                           |       |       |
|-------|------------|---------------------------|-------|-------|
| 13060 | 2019-10-14 | <i>Euptoieta hegesia</i>  | -78.6 | -56.8 |
| 13061 | 2019-10-14 | <i>Euptoieta hegesia</i>  | -73.8 | -52.7 |
| 13062 | 2019-10-14 | <i>Euptoieta hegesia</i>  | -59.6 | -40.6 |
| 13063 | 2019-10-14 | <i>Euptoieta hegesia</i>  | -70.7 | -50.1 |
| 13064 | 2019-10-14 | <i>Euptoieta hegesia</i>  | -66.8 | -46.8 |
| 13065 | 2019-10-26 | <i>Euptoieta hegesia</i>  | -60.4 | -41.3 |
| 13066 | 2019-10-26 | <i>Euptoieta hegesia</i>  | -63.3 | -43.8 |
| 13067 | 2019-10-26 | <i>Euptoieta hegesia</i>  | -58.4 | -39.6 |
| 13068 | 2019-10-29 | <i>Euptoieta hegesia</i>  | -81.6 | -59.3 |
| 13069 | 2019-11-04 | <i>Euptoieta hegesia</i>  | -67.1 | -43.6 |
| 13070 | 2019-11-04 | <i>Euptoieta hegesia</i>  | -66.3 | -46.3 |
| 13071 | 2019-10-08 | <i>Asterocampa leilia</i> | -73.7 | -53.7 |
| 13072 | 2019-10-14 | <i>Asterocampa leilia</i> | -92.6 | -69.8 |
| 13073 | 2019-10-14 | <i>Asterocampa leilia</i> | -77.1 | -56.6 |
| 13074 | 2019-10-14 | <i>Asterocampa leilia</i> | -73.7 | -53.8 |
| 13075 | 2019-10-14 | <i>Asterocampa leilia</i> | -66.9 | -47.9 |
| 13076 | 2019-10-19 | <i>Asterocampa leilia</i> | -68.3 | -49.1 |
| 13077 | 2019-10-19 | <i>Asterocampa leilia</i> | -75.0 | -54.8 |
| 13078 | 2019-10-19 | <i>Asterocampa leilia</i> | -69.0 | -49.8 |
| 13079 | 2019-10-19 | <i>Asterocampa leilia</i> | -74.1 | -54.1 |
| 13080 | 2019-10-19 | <i>Asterocampa leilia</i> | -73.9 | -53.9 |
| 13081 | 2019-10-19 | <i>Asterocampa leilia</i> | -81.3 | -60.2 |
| 13082 | 2019-10-19 | <i>Asterocampa leilia</i> | -70.9 | -51.4 |
| 13083 | 2019-10-19 | <i>Asterocampa leilia</i> | -63.9 | -45.4 |
| 13084 | 2019-10-19 | <i>Asterocampa leilia</i> | -66.1 | -47.3 |
| 13085 | 2019-10-19 | <i>Asterocampa leilia</i> | -78.6 | -57.8 |
| 13086 | 2019-01-23 | <i>Asterocampa leilia</i> | -74.6 | -54.5 |
| 13087 | 2019-01-23 | <i>Asterocampa leilia</i> | -67.6 | -48.6 |
| 13088 | 2019-01-23 | <i>Asterocampa leilia</i> | -67.4 | -48.4 |
| 13089 | 2019-10-29 | <i>Asterocampa leilia</i> | -72.9 | -53.0 |
| 13090 | 2019-10-29 | <i>Asterocampa leilia</i> | -70.3 | -50.9 |
| 13091 | 2019-10-29 | <i>Asterocampa leilia</i> | -63.1 | -44.7 |
| 13092 | 2019-10-29 | <i>Asterocampa leilia</i> | -68.1 | -49.0 |
| 13093 | 2019-10-29 | <i>Asterocampa leilia</i> | -67.4 | -48.4 |
| 13094 | 2019-11-02 | <i>Asterocampa leilia</i> | -66.0 | -47.2 |
| 13095 | 2019-11-02 | <i>Asterocampa leilia</i> | -70.1 | -50.6 |
| 13096 | 2019-11-02 | <i>Asterocampa leilia</i> | -60.6 | -42.7 |
| 13097 | 2019-11-02 | <i>Asterocampa leilia</i> | -66.7 | -47.8 |
| 13098 | 2019-11-02 | <i>Asterocampa leilia</i> | -72.5 | -52.7 |
| 13099 | 2019-11-02 | <i>Asterocampa leilia</i> | -63.4 | -45.0 |
| 13100 | 2019-11-02 | <i>Asterocampa leilia</i> | -66.3 | -47.5 |
| 13101 | 2019-11-02 | <i>Asterocampa leilia</i> | -58.9 | -41.2 |



---

|       |            |                           |       |       |
|-------|------------|---------------------------|-------|-------|
| 13102 | 2019-11-04 | <i>Asterocampa leilia</i> | -75.1 | -54.9 |
| 13103 | 2019-11-04 | <i>Asterocampa leilia</i> | -77.5 | -56.9 |
| 13104 | 2019-11-04 | <i>Asterocampa leilia</i> | -70.7 | -51.2 |
| 13105 | 2019-11-04 | <i>Asterocampa leilia</i> | -62.0 | -43.8 |
| 13106 | 2019-11-04 | <i>Asterocampa leilia</i> | -66.8 | -47.9 |
| 13107 | 2019-11-20 | <i>Asterocampa leilia</i> | -72.4 | -52.7 |
| 13108 | 2019-11-20 | <i>Asterocampa leilia</i> | -70.9 | -51.3 |
| 13450 | 2019-09-26 | <i>Zerene cesonia</i>     | -86.9 | -63.4 |
| 13451 | 2019-09-26 | <i>Zerene cesonia</i>     | -74.9 | -53.1 |
| 13452 | 2019-09-26 | <i>Zerene cesonia</i>     | -68.5 | -47.7 |
| 13453 | 2019-09-26 | <i>Zerene cesonia</i>     | -79.5 | -57.1 |
| 13454 | 2019-09-26 | <i>Zerene cesonia</i>     | -89.0 | -65.2 |
| 13455 | 2019-09-26 | <i>Zerene cesonia</i>     | -86.8 | -63.3 |
| 13456 | 2019-09-26 | <i>Zerene cesonia</i>     | -81.2 | -58.5 |
| 13457 | 2019-09-26 | <i>Zerene cesonia</i>     | -69.2 | -48.2 |
| 13458 | 2019-09-30 | <i>Zerene cesonia</i>     | -79.6 | -57.1 |
| 13459 | 2019-09-30 | <i>Zerene cesonia</i>     | -93.7 | -69.2 |
| 13460 | 2019-09-30 | <i>Zerene cesonia</i>     | -88.3 | -64.6 |
| 13461 | 2019-10-04 | <i>Zerene cesonia</i>     | -86.3 | -62.9 |
| 13462 | 2019-10-04 | <i>Zerene cesonia</i>     | -86.9 | -63.4 |
| 13463 | 2019-10-04 | <i>Zerene cesonia</i>     | -67.1 | -46.5 |
| 13464 | 2019-10-04 | <i>Zerene cesonia</i>     | -90.9 | -66.7 |
| 13465 | 2019-10-04 | <i>Zerene cesonia</i>     | -97.9 | -72.7 |
| 13466 | 2019-10-04 | <i>Zerene cesonia</i>     | -74.2 | -52.6 |
| 13467 | 2019-10-08 | <i>Zerene cesonia</i>     | -83.0 | -60.1 |
| 13468 | 2019-10-08 | <i>Zerene cesonia</i>     | -80.1 | -57.6 |
| 13469 | 2019-10-08 | <i>Zerene cesonia</i>     | -82.3 | -59.4 |
| 13470 | 2019-10-08 | <i>Zerene cesonia</i>     | -89.4 | -65.5 |
| 13471 | 2019-10-08 | <i>Zerene cesonia</i>     | -92.5 | -68.1 |
| 13472 | 2019-10-08 | <i>Zerene cesonia</i>     | -78.2 | -55.9 |
| 13473 | 2019-10-08 | <i>Zerene cesonia</i>     | -88.2 | -64.5 |
| 13474 | 2019-10-08 | <i>Zerene cesonia</i>     | -91.6 | -67.4 |
| 13475 | 2019-10-10 | <i>Zerene cesonia</i>     | -92.5 | -68.1 |
| 13476 | 2019-10-14 | <i>Zerene cesonia</i>     | -72.5 | -51.1 |
| 13477 | 2019-10-14 | <i>Zerene cesonia</i>     | -85.5 | -62.2 |
| 13478 | 2019-10-14 | <i>Zerene cesonia</i>     | -80.1 | -57.6 |
| 13479 | 2019-10-14 | <i>Zerene cesonia</i>     | -90.8 | -66.7 |
| 13480 | 2019-10-14 | <i>Zerene cesonia</i>     | -91.1 | -66.9 |
| 13481 | 2019-10-14 | <i>Zerene cesonia</i>     | -83.3 | -60.3 |
| 13482 | 2019-10-14 | <i>Zerene cesonia</i>     | -83.8 | -60.7 |
| 13483 | 2019-10-14 | <i>Zerene cesonia</i>     | -77.3 | -55.2 |
| 13484 | 2019-10-14 | <i>Zerene cesonia</i>     | -69.7 | -48.7 |

---

|       |            |                       |        |       |
|-------|------------|-----------------------|--------|-------|
| 13485 | 2019-10-14 | <i>Zerene cesonia</i> | -81.2  | -58.5 |
| 13486 | 2019-10-14 | <i>Zerene cesonia</i> | -74.4  | -52.7 |
| 13487 | 2019-10-14 | <i>Zerene cesonia</i> | -72.6  | -51.1 |
| 13488 | 2019-10-14 | <i>Zerene cesonia</i> | -69.5  | -48.6 |
| 13489 | 2019-10-14 | <i>Zerene cesonia</i> | -80.8  | -58.1 |
| 13490 | 2019-10-14 | <i>Zerene cesonia</i> | -74.0  | -52.4 |
| 13491 | 2019-10-14 | <i>Zerene cesonia</i> | -80.7  | -58.1 |
| 13492 | 2019-10-14 | <i>Zerene cesonia</i> | -74.1  | -52.5 |
| 13493 | 2019-10-14 | <i>Zerene cesonia</i> | -79.4  | -57.0 |
| 13494 | 2019-10-19 | <i>Zerene cesonia</i> | -70.6  | -49.4 |
| 13495 | 2019-10-19 | <i>Zerene cesonia</i> | -80.4  | -57.8 |
| 13496 | 2019-10-19 | <i>Zerene cesonia</i> | -78.6  | -56.3 |
| 13497 | 2019-10-19 | <i>Zerene cesonia</i> | -65.3  | -45.0 |
| 13498 | 2019-10-26 | <i>Zerene cesonia</i> | -62.8  | -42.8 |
| 13499 | 2019-10-26 | <i>Zerene cesonia</i> | -71.2  | -50.0 |
| 13500 | 2019-10-26 | <i>Zerene cesonia</i> | -78.4  | -56.1 |
| 13501 | 2019-10-26 | <i>Zerene cesonia</i> | -74.9  | -53.1 |
| 13502 | 2019-10-29 | <i>Zerene cesonia</i> | -83.0  | -60.0 |
| 13503 | 2019-10-29 | <i>Zerene cesonia</i> | -81.5  | -58.7 |
| 13504 | 2019-10-29 | <i>Zerene cesonia</i> | -95.5  | -70.6 |
| 13505 | 2019-10-29 | <i>Zerene cesonia</i> | -68.1  | -47.4 |
| 13506 | 2019-10-29 | <i>Zerene cesonia</i> | -71.9  | -50.6 |
| 13507 | 2019-11-02 | <i>Zerene cesonia</i> | -79.9  | -57.4 |
| 13508 | 2019-11-02 | <i>Zerene cesonia</i> | -69.8  | -48.8 |
| 13509 | 2019-11-02 | <i>Zerene cesonia</i> | -64.7  | -44.4 |
| 13510 | 2019-11-04 | <i>Zerene cesonia</i> | -75.1  | -53.3 |
| 13511 | 2019-11-04 | <i>Zerene cesonia</i> | -86.2  | -62.8 |
| 13512 | 2019-11-04 | <i>Zerene cesonia</i> | -68.9  | -48.0 |
| 13513 | 2019-11-04 | <i>Zerene cesonia</i> | -62.6  | -42.7 |
| 13514 | 2019-11-04 | <i>Zerene cesonia</i> | -98.8  | -73.5 |
| 13971 | 2019-11-04 | <i>Zerene cesonia</i> | -118.9 | -90.6 |
| 13972 | 2019-11-04 | <i>Zerene cesonia</i> | -103.0 | -77.1 |
| 13973 | 2019-11-04 | <i>Zerene cesonia</i> | -71.7  | -50.4 |
| 13974 | 2019-11-04 | <i>Zerene cesonia</i> | -76.0  | -54.0 |
| 13975 | 2019-11-04 | <i>Zerene cesonia</i> | -119.2 | -90.9 |
| 13976 | 2019-11-04 | <i>Zerene cesonia</i> | -101.8 | -76.1 |
| 13977 | 2019-11-20 | <i>Zerene cesonia</i> | -70.8  | -49.7 |
| 13978 | 2019-11-20 | <i>Zerene cesonia</i> | -74.2  | -52.5 |
| 13979 | 2019-10-04 | <i>Phoebis sennae</i> | -67.4  | -46.8 |
| 13980 | 2019-10-04 | <i>Phoebis sennae</i> | -61.9  | -42.1 |
| 13981 | 2019-10-04 | <i>Phoebis sennae</i> | -59.4  | -39.9 |
| 13982 | 2019-10-08 | <i>Phoebis sennae</i> | -74.7  | -56.5 |

---

|       |            |                       |       |       |
|-------|------------|-----------------------|-------|-------|
| 13983 | 2019-10-08 | <i>Phoebis sennae</i> | -43.0 | -29.3 |
| 13984 | 2019-10-08 | <i>Phoebis sennae</i> | -55.7 | -40.2 |
| 13985 | 2019-10-08 | <i>Phoebis sennae</i> | -77.0 | -58.5 |
| 13986 | 2019-10-08 | <i>Phoebis sennae</i> | -27.9 | -16.3 |
| 13987 | 2019-10-08 | <i>Phoebis sennae</i> | -63.3 | -46.7 |
| 13988 | 2019-10-14 | <i>Phoebis sennae</i> | -43.1 | -29.4 |
| 13989 | 2019-10-19 | <i>Phoebis sennae</i> | -46.5 | -32.3 |
| 13990 | 2019-10-19 | <i>Phoebis sennae</i> | -77.5 | -58.9 |
| 13991 | 2019-10-19 | <i>Phoebis sennae</i> | -94.2 | -73.2 |
| 13992 | 2019-10-19 | <i>Phoebis sennae</i> | -52.6 | -37.5 |
| 13993 | 2019-10-19 | <i>Phoebis sennae</i> | -69.7 | -52.2 |
| 13994 | 2019-10-26 | <i>Phoebis sennae</i> | -69.0 | -51.6 |
| 13995 | 2019-10-26 | <i>Phoebis sennae</i> | -74.1 | -55.9 |
| 13996 | 2019-10-26 | <i>Phoebis sennae</i> | -64.5 | -47.7 |
| 13997 | 2019-10-26 | <i>Phoebis sennae</i> | -64.2 | -47.5 |
| 13998 | 2019-10-26 | <i>Phoebis sennae</i> | -69.0 | -51.6 |
| 13999 | 2019-10-26 | <i>Phoebis sennae</i> | -68.0 | -50.7 |
| 14000 | 2019-10-26 | <i>Phoebis sennae</i> | -81.7 | -62.5 |
| 14001 | 2019-10-26 | <i>Phoebis sennae</i> | -86.2 | -66.4 |
| 14002 | 2019-10-26 | <i>Phoebis sennae</i> | -80.0 | -61.0 |
| 14003 | 2019-10-26 | <i>Phoebis sennae</i> | -72.0 | -54.2 |
| 14004 | 2019-10-26 | <i>Phoebis sennae</i> | -64.6 | -47.8 |
| 14005 | 2019-10-26 | <i>Phoebis sennae</i> | -56.0 | -40.4 |
| 14006 | 2019-10-26 | <i>Phoebis sennae</i> | -81.4 | -62.3 |
| 14007 | 2019-10-29 | <i>Phoebis sennae</i> | -50.3 | -35.5 |
| 14008 | 2019-10-29 | <i>Phoebis sennae</i> | -53.0 | -37.8 |
| 14009 | 2019-10-29 | <i>Phoebis sennae</i> | -58.4 | -42.5 |
| 14010 | 2019-10-29 | <i>Phoebis sennae</i> | -66.1 | -49.1 |
| 14011 | 2019-10-29 | <i>Phoebis sennae</i> | -84.9 | -65.2 |
| 14012 | 2019-10-29 | <i>Phoebis sennae</i> | -54.8 | -39.4 |
| 14013 | 2019-10-29 | <i>Phoebis sennae</i> | -72.6 | -54.7 |
| 14014 | 2019-10-29 | <i>Phoebis sennae</i> | -99.8 | -78.0 |
| 14015 | 2019-10-29 | <i>Phoebis sennae</i> | -61.6 | -45.2 |
| 14016 | 2019-10-29 | <i>Phoebis sennae</i> | -82.0 | -62.8 |
| 14017 | 2019-11-02 | <i>Phoebis sennae</i> | -63.8 | -47.1 |
| 14018 | 2019-11-02 | <i>Phoebis sennae</i> | -71.5 | -53.8 |
| 14019 | 2019-11-02 | <i>Phoebis sennae</i> | -70.2 | -52.6 |
| 14020 | 2019-11-02 | <i>Phoebis sennae</i> | -58.5 | -38.4 |
| 14021 | 2019-11-02 | <i>Phoebis sennae</i> | -71.3 | -49.3 |
| 14022 | 2019-11-02 | <i>Phoebis sennae</i> | -71.7 | -49.7 |
| 14023 | 2019-11-02 | <i>Phoebis sennae</i> | -78.0 | -55.1 |
| 14024 | 2019-11-02 | <i>Phoebis sennae</i> | -60.1 | -39.8 |

---

|       |            |                       |       |       |
|-------|------------|-----------------------|-------|-------|
| 14025 | 2019-11-04 | <i>Phoebis sennae</i> | -60.8 | -40.4 |
| 14026 | 2019-11-04 | <i>Phoebis sennae</i> | -59.2 | -39.0 |
| 14027 | 2019-11-04 | <i>Phoebis sennae</i> | -47.1 | -28.7 |
| 14028 | 2019-11-04 | <i>Phoebis sennae</i> | -38.1 | -21.1 |
| 14029 | 2019-11-04 | <i>Phoebis sennae</i> | -69.1 | -47.5 |
| 14030 | 2019-11-04 | <i>Phoebis sennae</i> | -75.2 | -52.7 |
| 14031 | 2019-11-04 | <i>Phoebis sennae</i> | -63.2 | -42.4 |
| 14032 | 2019-11-04 | <i>Phoebis sennae</i> | -56.4 | -36.6 |
| 14033 | 2019-11-04 | <i>Phoebis sennae</i> | -59.1 | -38.9 |
| 14034 | 2019-11-04 | <i>Phoebis sennae</i> | -67.3 | -45.9 |
| 14035 | 2019-11-04 | <i>Phoebis sennae</i> | -63.3 | -42.5 |
| 14036 | 2019-11-04 | <i>Phoebis sennae</i> | -57.1 | -37.2 |
| 14037 | 2019-11-20 | <i>Phoebis sennae</i> | -66.9 | -45.6 |
| 14038 | 2019-11-20 | <i>Phoebis sennae</i> | -79.3 | -56.2 |
| 14039 | 2019-11-20 | <i>Phoebis sennae</i> | -59.4 | -39.2 |
| 14040 | NA         | <i>Phoebis sennae</i> | -55.2 | -35.6 |
| 14041 | NA         | <i>Phoebis sennae</i> | -37.5 | -20.5 |
| 14042 | NA         | <i>Phoebis sennae</i> | -73.9 | -51.6 |
| 14043 | NA         | <i>Phoebis sennae</i> | -70.6 | -48.7 |
